# Supplementary material for: Transcriptome analysis of the Holly mangrove Acanthus ilicifolius and its terrestrial relative, Acanthus leucostachyus, provides insights into adaptation to intertidal zones
Source: PubMed Central journal article supplement (PMC4536770; doi:10.1186/s12864-015-1813-9), 2015-08-14

**a**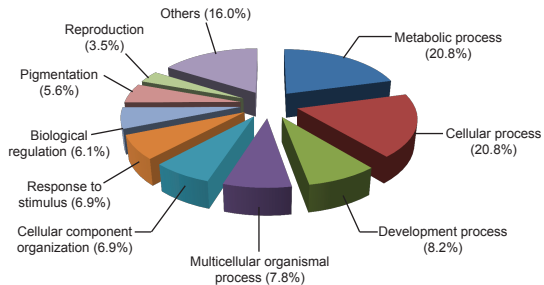**b**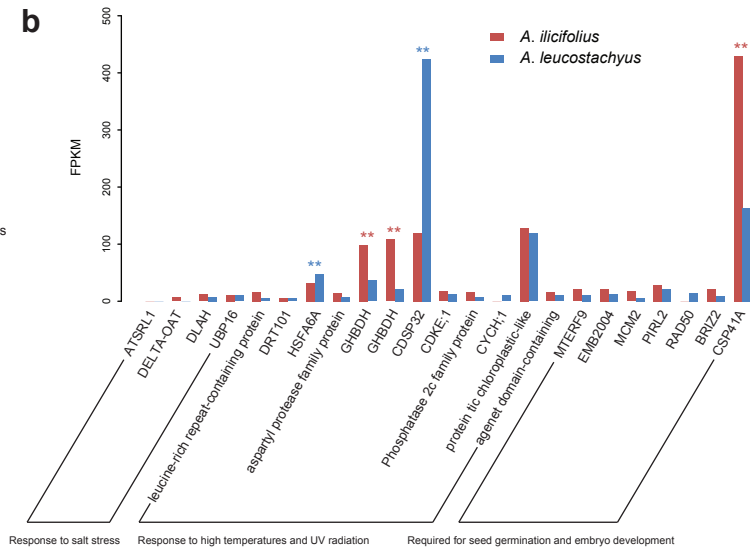

Supplement: 12864_2015_1813_MOESM6_ESM.pdf [file 12864_2015_1813_MOESM6_ESM.pdf]
